# Supplementary material for: Hypoxia down-regulates expression of secretory leukocyte protease inhibitor in bronchial epithelial cells via TGF-β1
Source: Springer Nature journal article supplement (doi:10.1186/s12890-015-0016-0), 2015-03-06

# Suppl. Fig. 1

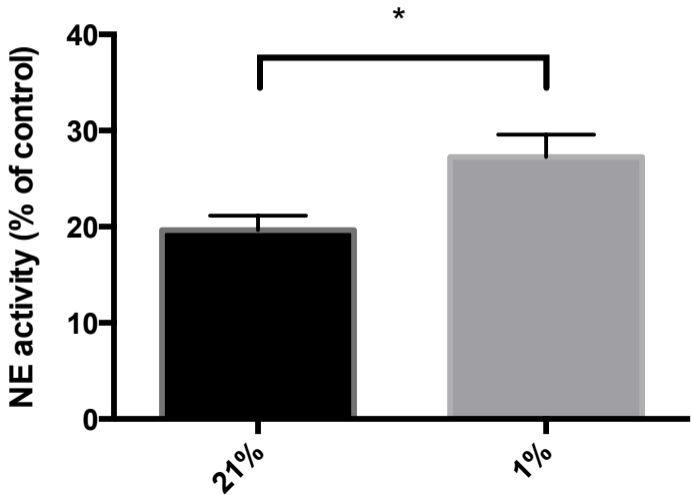

Supplement: MOESM1 [file 9751736]
